# Supplementary material for: A Novel Prophylaxis Strategy Using Liposomal Vaccine Adjuvant CAF09b Protects against Influenza Virus Disease
Source: MDPI journal article supplement (doi:10.3390/ijms23031850), 2022-02-06
Supplement: s1 [file s1]

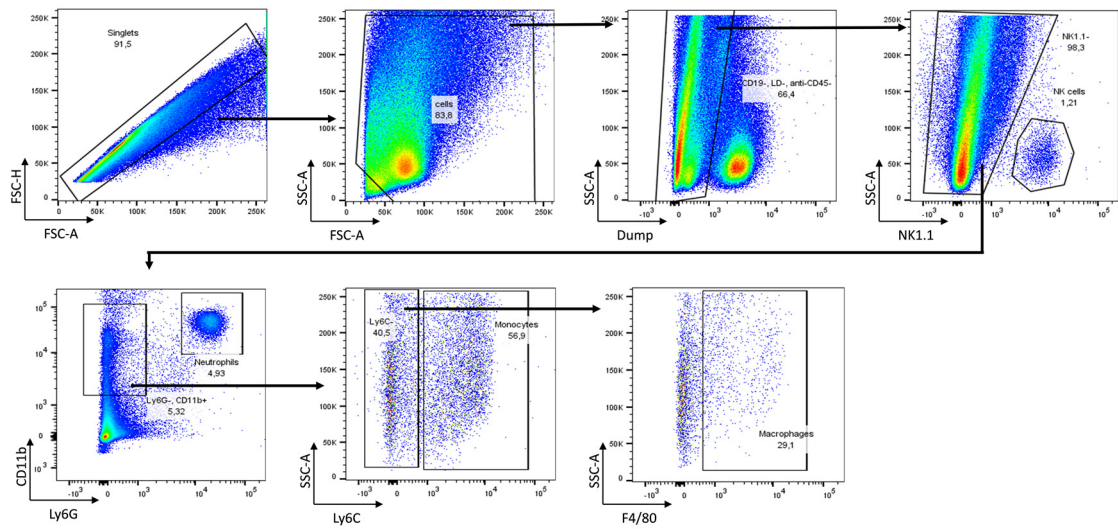

**Figure S1.** Flow cytometry gating strategy using a lung from a mouse administered CAF09b twice.

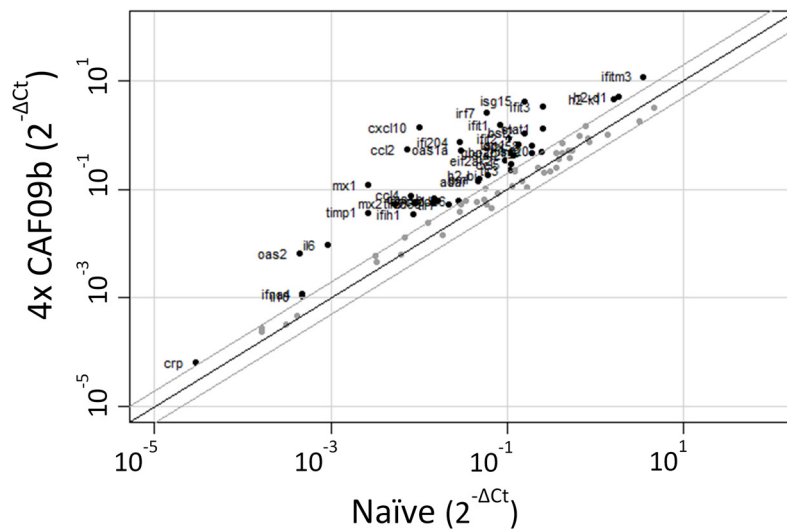

**Figure S2.** The effect of four times i.n. administration of 20 µL of CAF09b on the type I interferon related genes. Naïve vs 4x CAF09b.

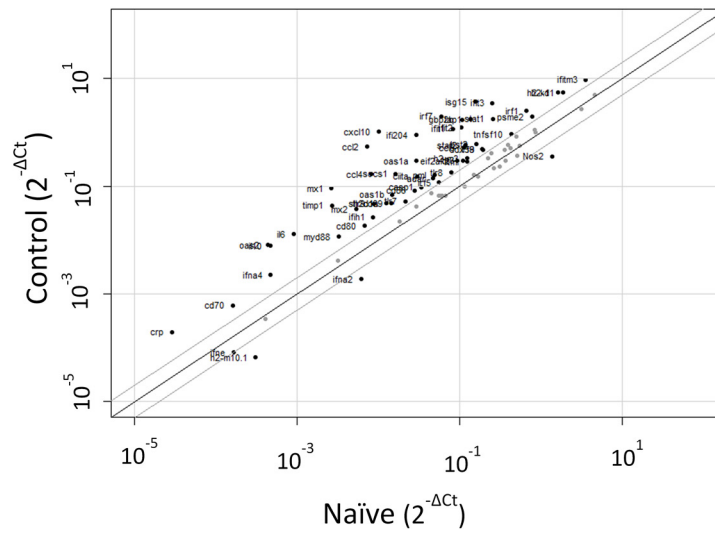

**Figure S3.** The effect of influenza challenge. Control mice vs. naïve mice.
